# Supplementary material for: Swine Backyard Production Systems in Central Chile: Characterizing Farm Structure, Animal Management, and Production Value Chain
Source: MDPI journal article supplement (doi:10.3390/ani13122000), 2023-06-15

## Supplemental material

**Table S1.** Characterization of swine backyard production systems in the central zone of Chile, 2021 - 2022 (n = 22).

| Variable                         | Categories                           | Number | Percentage |
|----------------------------------|--------------------------------------|--------|------------|
| Main objective of swine breeding | Household consumption                | 9      | 41%        |
|                                  | Sale                                 | 2      | 9%         |
|                                  | Household consumption and sale       | 8      | 36%        |
|                                  | No product obtained                  | 3      | 14%        |
|                                  | Total                                | 22     |            |
| Years of swine rearing           | Less than 2 years                    | 5      | 23%        |
|                                  | Between 2 and 10 years               | 6      | 27%        |
|                                  | More than 10 years                   | 11     | 50%        |
|                                  | Total                                | 22     |            |
| Confinement                      | Free range                           | 0      | 0%         |
|                                  | Mixed                                | 5      | 23%        |
|                                  | Permanent                            | 17     | 77%        |
|                                  | Total                                | 22     |            |
| Swine management                 | Woman in charge                      | 8      | 36%        |
|                                  | Man in charge                        | 11     | 50%        |
|                                  | Family in charge                     | 3      | 14%        |
|                                  | Total                                | 22     |            |
| Veterinary care                  | No veterinary care                   | 14     | 64%        |
|                                  | Veterinary care at least once a year | 8      | 36%        |
|                                  | Total                                | 22     |            |
| Feeding                          | Grains                               | 3      | 13%        |
|                                  | Swine feed                           | 1      | 5%         |
|                                  | Scavenging and household scrap       | 1      | 5%         |
|                                  | Mixed                                | 17     | 77%        |
|                                  | Total                                | 22     |            |
| Water                            | Potable sources                      | 22     | 100%       |
|                                  | Environmental sources                | 0      | 0%         |
|                                  | Total                                | 22     |            |
| Mortalities handling             | Bury                                 | 4      | 18%        |
|                                  | Burn                                 | 0      | 0%         |
|                                  | Throw to the garbage                 | 0      | 0%         |
|                                  | Throw far away                       | 1      | 5%         |

|                                        |                               |    |     |
|----------------------------------------|-------------------------------|----|-----|
|                                        | Household consumption or sale | 0  | 0%  |
|                                        | Nothing                       | 0  | 0%  |
|                                        | Mixed                         | 0  | 0%  |
|                                        | No mortalities reported       | 17 | 77% |
|                                        | Total                         | 22 |     |
| Movement of swine<br>in or out the BPS | Yes                           | 6  | 27% |
|                                        | No                            | 16 | 73% |
|                                        | Total                         | 22 |     |
| Replacement                            | Own offspring                 | 12 | 54% |
|                                        | Neighbors                     | 5  | 23% |
|                                        | Own offspring and neighbors   | 4  | 18% |
|                                        | Markets or other              | 1  | 5%  |
|                                        | Total                         | 22 |     |

**Figure S1.** Characterization of biosecurity measures implemented in swine backyard production systems in the central zone of Chile, 2021 – 2022 (n = 22).

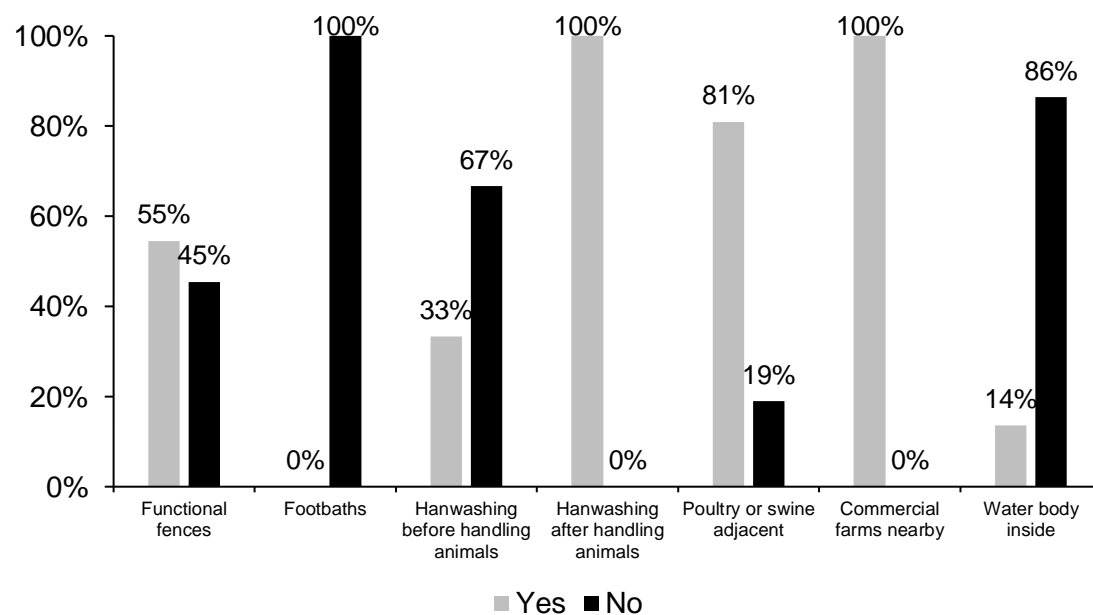

Supplement: s1 [file s1]
